# Supplementary material for: Selective Antibody-Free Sensing Membranes for Picogram Tetracycline Detection
Source: MDPI journal article supplement (doi:10.3390/bios13010071), 2022-12-31
Supplement: s1 [file s1]

Supplementary information

# Selective Antibody-Free Sensing Membranes for Picogram Antibiotic Detection

Hamdi Ben Halima <sup>1</sup>, Abdoullatif Baraket <sup>1</sup>, Clara Vinas <sup>2</sup>, Nadia Zine <sup>1</sup>, Joan Bausells <sup>3</sup>, Nicole Jaffrezic-Renault <sup>1,\*</sup>, Francesc Teixidor <sup>2</sup> and Abdelhamid Errachid <sup>1</sup>

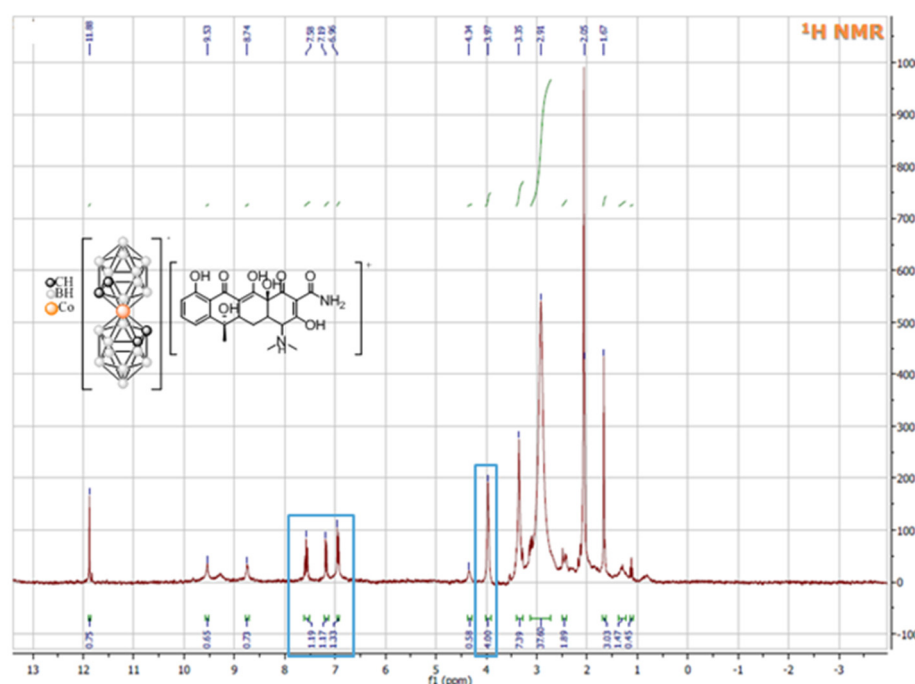

**Figure S1.** <sup>1</sup>H NMR spectrum of [o-COSAN]/tetracycline (deuterated acetone).

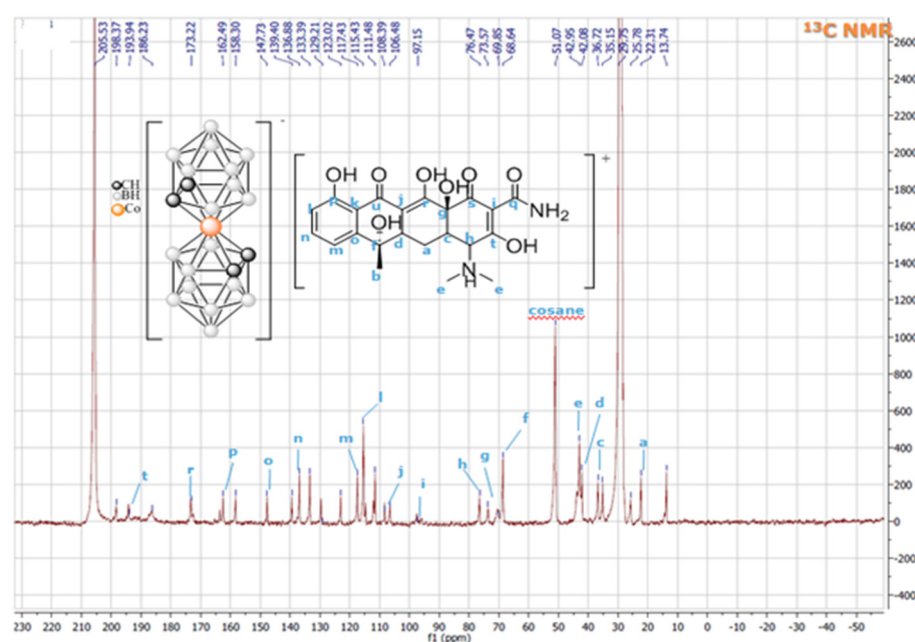

**Figure S2.** <sup>13</sup>C NMR spectrum of [o-COSAN]/tetracycline (deuterated acetone).

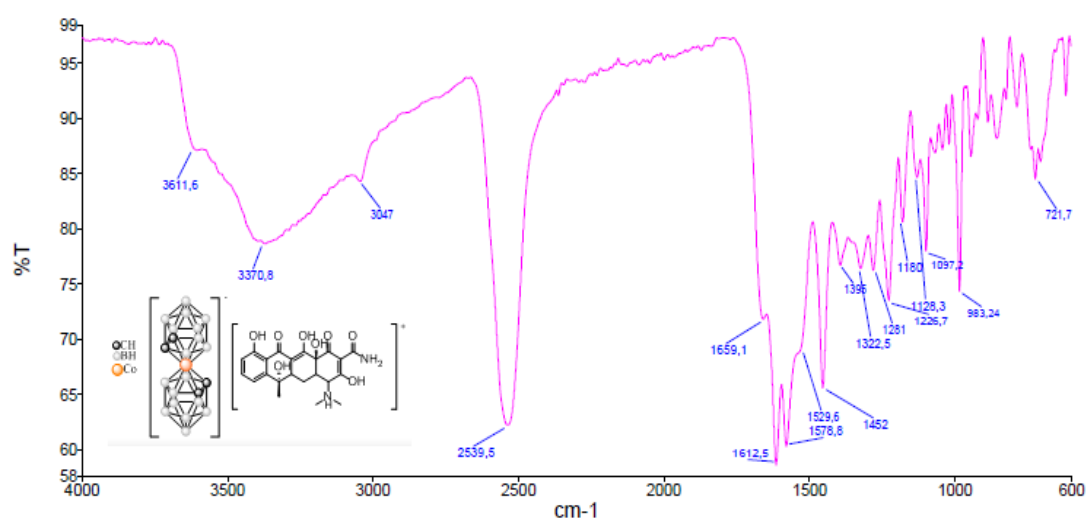

Figure S3. FTIR spectrum of [o-COSAN]/tetracycline.

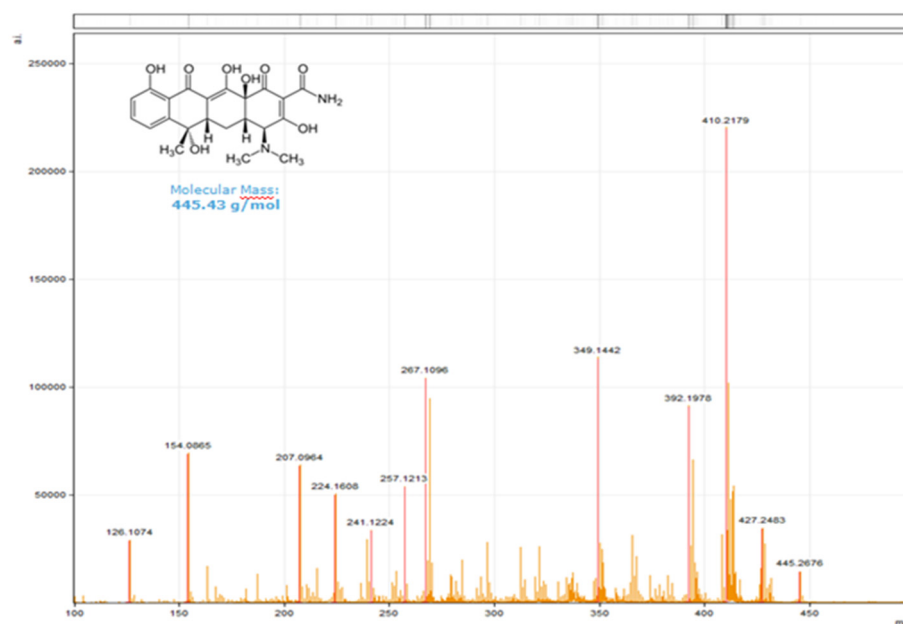

Figure S4. MALDI-TOF spectrum of [o-COSAN]/tetracycline with matrix (positive part).

Table S1. Overview of elemental analysis in [o-COSAN]/tetracycline.

|                         |         | %C    | %H   | %N   | %S |
|-------------------------|---------|-------|------|------|----|
| Cosane/<br>Tetracycline | Theory  | 40.52 | 6.23 | 3.64 | 0  |
|                         | Reality | 40.00 | 6.00 | 3.50 | 0  |

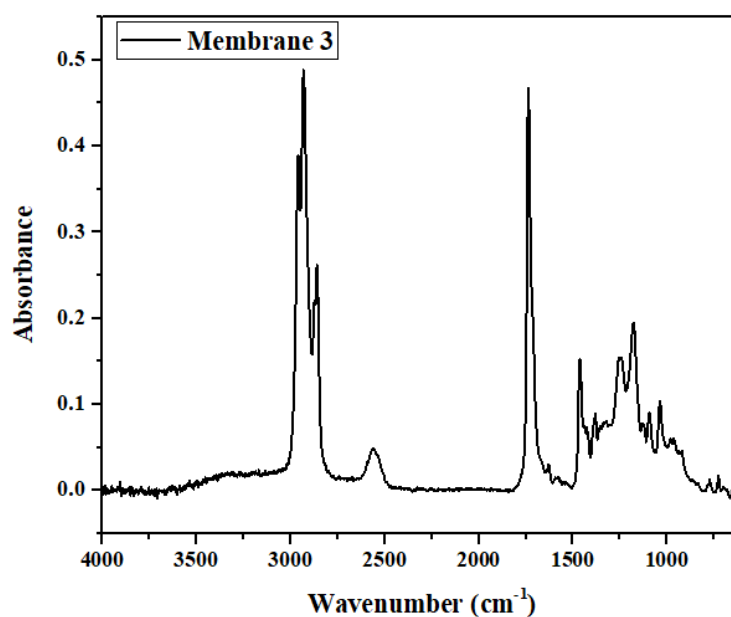

Figure S5. FTIR spectrum of membrane 3.

FTIR spectrum of membrane 3 displays the  $\nu(\text{N-H; O-H})$  at  $3344\text{--}3400\text{ cm}^{-1}$ ;  $\nu(\text{C-H})$  at  $2859\text{--}2959\text{ cm}^{-1}$ ;  $\nu(\text{B-H})$  at  $2563\text{ cm}^{-1}$ ;  $\nu(\text{C=O})$  at  $1741\text{ cm}^{-1}$ ;  $\nu(\text{C-H})$  at  $1381\text{--}1464\text{ cm}^{-1}$ ;  $\nu(\text{C=O}_{\text{amide}}; \text{C=C}; \text{C=C}_{\text{aromatique}}; \text{N-H})$  at  $1451\text{--}1498\text{ cm}^{-1}$ ;  $\nu(\text{C-H})$  at  $1325\text{--}1451\text{ cm}^{-1}$ ;  $\nu(\text{C-O}; \text{C-C}; \text{C-N})$  at  $1019\text{--}1325\text{ cm}^{-1}$ .

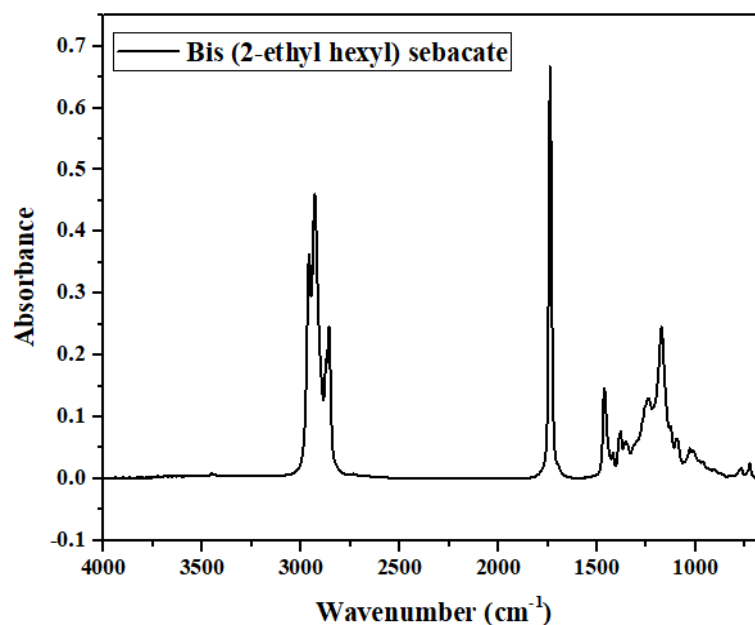

Figure S6. FTIR spectrum of bis (2-ethyl hexyl) sebacate.

FTIR spectrum of bis (2-ethyl hexyl) sebacate displays the  $\nu(\text{C-H})$  at  $2859\text{--}2959\text{ cm}^{-1}$ ;  $\nu(\text{C=O})$  at  $1739\text{ cm}^{-1}$ ;  $\nu(\text{C-H})$  at  $1381\text{--}1464\text{ cm}^{-1}$ ;  $\nu(\text{C-C})$  at  $1030\text{--}1241\text{ cm}^{-1}$ .

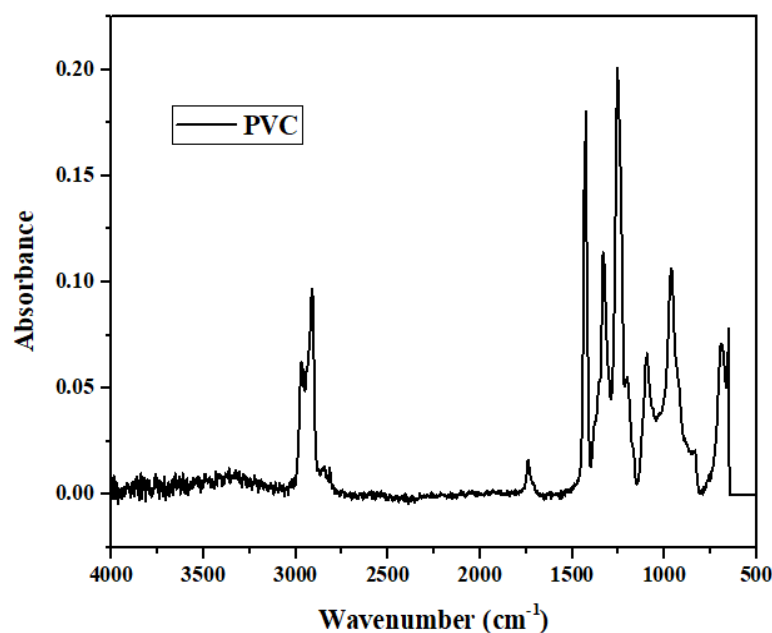

Figure S7. FTIR spectrum of PVC.

FTIR spectrum of PVC displays the  $\nu(\text{C-H})$  at 2911–2970  $\text{cm}^{-1}$ ;  $\nu(\text{C-H})$  at 1332–1427  $\text{cm}^{-1}$ ;  $\nu(\text{C-C})$  at 1094–1255  $\text{cm}^{-1}$ ;  $\nu(\text{C-Cl})$  at 689  $\text{cm}^{-1}$ .

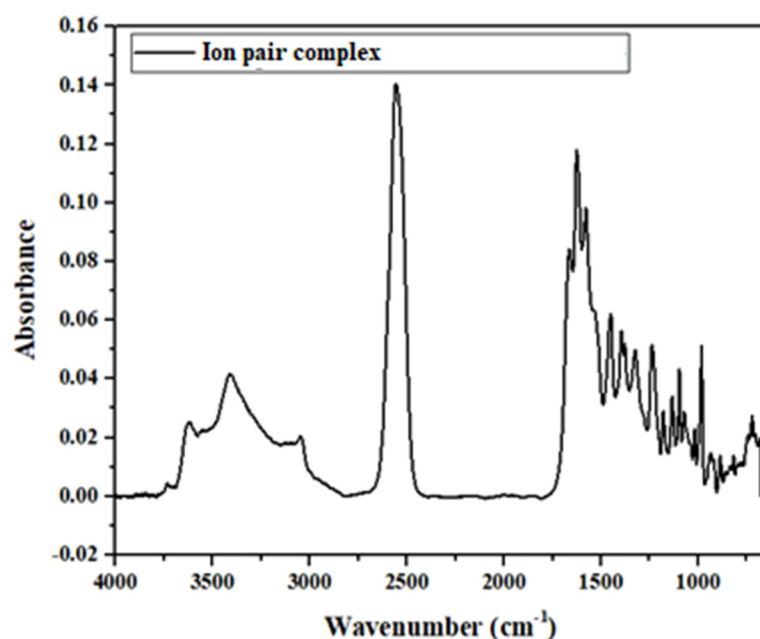

Figure S8. FTIR spectrum of [o-COSAN]<sup>-</sup>/tetracycline ion pair complex.

FTIR spectrum of ionophore of cobaltabisdiscarbollide displays a strong and characteristic  $\nu(\text{B-H})$  frequency in the infrared range 2556  $\text{cm}^{-1}$  in which no other frequencies of organic compounds appear. The FTIR spectrum displays the  $\nu(\text{O-H})$  stretching vibration at 3617  $\text{cm}^{-1}$ ;  $\nu(\text{N-H}; \text{O-H})$  at 3411–3617  $\text{cm}^{-1}$ ;  $\nu(\text{C-H})$  at 3050  $\text{cm}^{-1}$ ;  $\nu(\text{B-H})$  at 2556  $\text{cm}^{-1}$ ;  $\nu(\text{C=O}_{\text{amide}}; \text{C=C}; \text{C=C}_{\text{aromatic}}; \text{N-H})$  at 1451–1663  $\text{cm}^{-1}$ ;  $\nu(\text{C-H})$  at 1325–1451  $\text{cm}^{-1}$ ;  $\nu(\text{C-O}; \text{C-C}; \text{C-N})$  at 1019–1325  $\text{cm}^{-1}$ ;  $\nu(\text{C-H}; \text{C=C})$  at 723–983  $\text{cm}^{-1}$ .

**Table S2.** Fitting parameters obtained from Randles equivalent circuit model [ $R_s + Q_2 / (R_{ct} + Z_w)$ ] (membrane 3 detection of tetracycline).

| 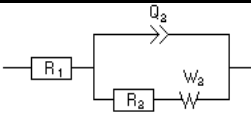 |  | <b>R1 (kΩ)</b>                                   | <b>Q2 (nF.s<sup>(a-1)</sup>)</b>                    | <b>R2 (kΩ)</b>                                  | <b>s2 (kΩ.s<sup>-1/2</sup>)</b>              | <b>X<sup>2</sup></b>   |
|-----------------------------------------------------------------------------------|--|--------------------------------------------------|-----------------------------------------------------|-------------------------------------------------|----------------------------------------------|------------------------|
| PBS                                                                               |  | $3687 \times 10^{-3} \pm 0.6877 \times 10^{-3}$  | $0.1119 \times 10^{-9} \pm 4.294 \times 10^{-15}$   | $0.936253 \times 10^3 \pm 1.856 \times 10^{-3}$ | $1.588 \times 10^3 \pm 14.86 \times 10^{-3}$ | $4.125 \times 10^{-3}$ |
| 1 pg/L                                                                            |  | $11706 \times 10^{-3} \pm 0.2448 \times 10^{-3}$ | $0.1357 \times 10^{-9} \pm 1.475 \times 10^{-15}$   | $2.943 \times 10^3 \pm 1.901 \times 10^{-3}$    | $2.753 \times 10^3 \pm 14.52 \times 10^{-3}$ | $8.571 \times 10^{-3}$ |
| 50 pg/L                                                                           |  | $10822 \times 10^{-3} \pm 0.3578 \times 10^{-3}$ | $0.1374 \times 10^{-9} \pm 0.7108 \times 10^{-15}$  | $5.706 \times 10^3 \pm 1.88 \times 10^{-3}$     | $5.041 \times 10^3 \pm 11.51 \times 10^{-3}$ | $5.612 \times 10^{-3}$ |
| 0.1 ng/L                                                                          |  | $16655 \times 10^{-3} \pm 0.4266 \times 10^{-3}$ | $0.1438 \times 10^{-9} \pm 0.5499 \times 10^{-15}$  | $8.116 \times 10^3 \pm 1.753 \times 10^{-3}$    | $7.496 \times 10^3 \pm 14.19 \times 10^{-3}$ | $6.395 \times 10^{-3}$ |
| 0.5 ng/L                                                                          |  | $8611 \times 10^{-3} \pm 0.2921 \times 10^{-3}$  | $0.1472 \times 10^{-9} \pm 0.55541 \times 10^{-15}$ | $9.762 \times 10^3 \pm 2.352 \times 10^{-3}$    | $9.148 \times 10^3 \pm 16.66 \times 10^{-3}$ | $3.488 \times 10^{-3}$ |
| 1 ng/L                                                                            |  | $23889 \times 10^{-3} \pm 0.3422 \times 10^{-3}$ | $0.148 \times 10^{-9} \pm 0.6116 \times 10^{-15}$   | $11.07 \times 10^3 \pm 3.405 \times 10^{-3}$    | $11.57 \times 10^3 \pm 34.21 \times 10^{-3}$ | $2.745 \times 10^{-3}$ |
| 1.5 ng/L                                                                          |  | $5835 \times 10^{-3} \pm 0.4588 \times 10^{-3}$  | $0.143910^{-9} \pm 0.5297 \times 10^{-15}$          | $12.33 \times 10^3 \pm 4.284 \times 10^{-3}$    | $13.61 \times 10^3 \pm 35.79 \times 10^{-3}$ | $2.454 \times 10^{-3}$ |
| 2ng/L                                                                             |  | $15 \pm 0.5623 \times 10^{-3}$                   | $0.1432 \times 10^{-9} \pm 0.3862 \times 10^{-15}$  | $13.37 \times 10^3 \pm 3.056 \times 10^{-3}$    | $12.64 \times 10^3 \pm 25.41 \times 10^{-3}$ | $3.085 \times 10^{-3}$ |
| 3ng/L                                                                             |  | $15636 \times 10^{-3} \pm 0.5435 \times 10^{-3}$ | $0.145 \times 10^{-9} \pm 0.328 \times 10^{-15}$    | $14.36 \times 10^3 \pm 1.939 \times 10^{-3}$    | $13.45 \times 10^3 \pm 19.36 \times 10^{-3}$ | $3.955 \times 10^{-3}$ |
| 4ng/L                                                                             |  | $15317 \times 10^{-3} \pm 0.5591 \times 10^{-3}$ | $0.1408 \times 10^{-9} \pm 0.2865 \times 10^{-15}$  | $15.86 \times 10^3 \pm 2.505 \times 10^{-3}$    | $15.39 \times 10^3 \pm 20.17 \times 10^{-3}$ | $5.033 \times 10^{-3}$ |
| 5ng/L                                                                             |  | $-28246 \times 10^{-3} \pm 0.631 \times 10^{-3}$ | $0.1503 \times 10^{-9} \pm 0.3127 \times 10^{-15}$  | $17.23 \times 10^3 \pm 4.832 \times 10^{-3}$    | $16.74 \times 10^3 \pm 29.11 \times 10^{-3}$ | $2.156 \times 10^{-3}$ |

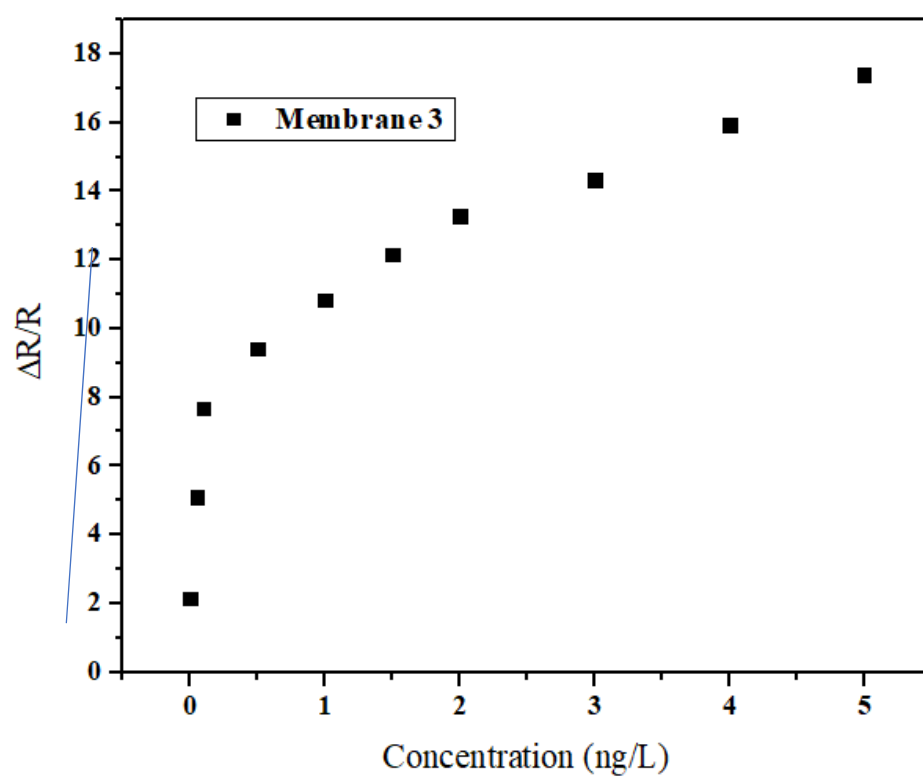

**Figure S9.** Calibration curve of the tetracycline sensor with membrane 3.
